# Supplementary material for: Multiple Micronutrients, Lutein, and Docosahexaenoic Acid Supplementation during Lactation: A Randomized Controlled Trial
Source: PubMed Central journal article supplement (PMC7765837; doi:10.3390/nu12123849), 2020-12-16
Supplement: nutrients-12-03849-s001.pdf [file nutrients-12-03849-s001.pdf]

Supplementary tables

Table 1. Assessment schedule.

| Visit and timing                                                                                                                                                                                                                        | V1a              | V1b                          | V2                           | PC1                            | PC2                            | V3                             | PC3                            | PC4                             | V4                              | PC5                             |
|-----------------------------------------------------------------------------------------------------------------------------------------------------------------------------------------------------------------------------------------|------------------|------------------------------|------------------------------|--------------------------------|--------------------------------|--------------------------------|--------------------------------|---------------------------------|---------------------------------|---------------------------------|
|                                                                                                                                                                                                                                         | Screening        |                              | B&R                          |                                |                                |                                |                                |                                 | EoS                             | Final FU                        |
|                                                                                                                                                                                                                                         | GA week<br>34/35 | 2–4 wks<br>after<br>delivery | 4–6 wks<br>after<br>delivery | 2 wks<br>after V2<br>(±3 days) | 4 wks<br>after V2<br>(±3 days) | 6 wks<br>after V2<br>(±3 days) | 8 wks<br>after V2<br>(±3 days) | 10 wks<br>after V2<br>(±3 days) | 12 wks<br>after V2<br>(±3 days) | 7 days<br>after V4<br>(±3 days) |
| Subject informed consent                                                                                                                                                                                                                | X                |                              |                              |                                |                                |                                |                                |                                 |                                 |                                 |
| Inclusion/exclusion criteria                                                                                                                                                                                                            | X                | X                            | X                            |                                |                                |                                |                                |                                 |                                 |                                 |
| Medical/surgical history                                                                                                                                                                                                                | X                |                              |                              |                                |                                |                                |                                |                                 |                                 |                                 |
| Demographics                                                                                                                                                                                                                            | X                |                              |                              |                                |                                |                                |                                |                                 |                                 |                                 |
| History of previous birth outcomes                                                                                                                                                                                                      | X                |                              |                              |                                |                                |                                |                                |                                 |                                 |                                 |
| History or current intake of lutein, DHA,<br>and MMN intake                                                                                                                                                                             | X                | X                            | X                            |                                |                                | X                              |                                |                                 | X                               |                                 |
| History and review of drug, alcohol and<br>nicotine use                                                                                                                                                                                 | X                | X                            | X                            |                                |                                | X                              |                                |                                 | X                               |                                 |
| Assessment of pregnancy                                                                                                                                                                                                                 | X                |                              |                              |                                |                                |                                |                                |                                 |                                 |                                 |
| Medication history over past 30 days                                                                                                                                                                                                    | X                |                              |                              |                                |                                |                                |                                |                                 |                                 |                                 |
| Physical examination                                                                                                                                                                                                                    | X                | X                            | X                            |                                |                                | X                              |                                |                                 | X                               |                                 |
| Vital signs (sitting blood pressure, pulse<br>rate)                                                                                                                                                                                     | X                | X                            | X                            |                                |                                | X                              |                                |                                 | X                               |                                 |
| Height, weight and body mass index <sup>a</sup>                                                                                                                                                                                         | X                | X                            | X                            |                                |                                | X                              |                                |                                 | X                               |                                 |
| Type of delivery                                                                                                                                                                                                                        |                  | X                            |                              |                                |                                |                                |                                |                                 |                                 |                                 |
| Infant birth weight and infant assessment                                                                                                                                                                                               |                  | X                            |                              |                                |                                |                                |                                |                                 |                                 |                                 |
| Record infant Apgar score at 5 min after<br>birth                                                                                                                                                                                       |                  | X                            |                              |                                |                                |                                |                                |                                 |                                 |                                 |
| Delivery complications                                                                                                                                                                                                                  |                  | X                            |                              |                                |                                |                                |                                |                                 |                                 |                                 |
| Blood sampling for fatty acids in plasma<br>GPL, DHA/TFA ratio, IFN-gamma; TGF-<br>beta, folic acid, vitamin B12 and<br>homocysteine, alpha-tocopherol and<br>retinol, carotenoids (lutein, zeaxanthin,<br>lycopene, carotene), 25(OH)D |                  |                              | X                            |                                |                                | X                              |                                |                                 | X                               |                                 |

| Visit and timing                                              | V1a              | V1b                          | V2                           | PC1                            | PC2                            | V3                             | PC3                            | PC4                             | V4                              | PC5                             |
|---------------------------------------------------------------|------------------|------------------------------|------------------------------|--------------------------------|--------------------------------|--------------------------------|--------------------------------|---------------------------------|---------------------------------|---------------------------------|
|                                                               | Screening        |                              | B&R                          |                                |                                |                                |                                |                                 | EoS                             | Final FU                        |
|                                                               | GA week<br>34/35 | 2–4 wks<br>after<br>delivery | 4–6 wks<br>after<br>delivery | 2 wks<br>after V2<br>(±3 days) | 4 wks<br>after V2<br>(±3 days) | 6 wks<br>after V2<br>(±3 days) | 8 wks<br>after V2<br>(±3 days) | 10 wks<br>after V2<br>(±3 days) | 12 wks<br>after V2<br>(±3 days) | 7 days<br>after V4<br>(±3 days) |
| Mothers' milk nutritional composition <sup>b</sup>            |                  |                              | X                            |                                |                                | X                              |                                |                                 | X                               |                                 |
| Randomization of trial product kit to subject                 |                  |                              | X                            |                                |                                |                                |                                |                                 |                                 |                                 |
| Check for supplementation compliance and breastfeeding status |                  |                              |                              | X                              | X                              | X                              | X                              | X                               | X                               |                                 |
| Return of study product                                       |                  |                              |                              |                                |                                | X                              |                                |                                 | X                               |                                 |
| Dispense new study product                                    |                  |                              | X                            |                                |                                | X                              |                                |                                 | X                               |                                 |
| Review of concomitant medications                             |                  | X                            | X                            | X                              | X                              | X                              | X                              | X                               | X                               |                                 |
| Food consumption assessment (Food Frequency Questionnaire)    | X                |                              | X                            |                                |                                | X                              |                                |                                 | X                               |                                 |
| Well-being assessment (psychological fatigue questionnaire)   |                  |                              | X                            |                                |                                | X                              |                                |                                 | X                               |                                 |
| Infant assessments <sup>c</sup>                               |                  |                              | X                            |                                |                                | X                              |                                |                                 | X                               |                                 |
| Assess adverse events                                         |                  | X                            | X                            | X                              | X                              | X                              | X                              | X                               | X                               | X                               |
| Safety laboratory                                             | X <sup>d</sup>   | X                            | X                            |                                |                                | X <sup>e</sup>                 |                                |                                 | X                               |                                 |
| Subject identification assignment                             | X                |                              |                              |                                |                                |                                |                                |                                 |                                 |                                 |
| Subject discontinuation                                       |                  |                              |                              |                                |                                |                                |                                |                                 | X                               |                                 |

<sup>a</sup> Body mass index was assessed only at V1b, 2, and 4. <sup>b</sup> Mothers' baseline milk nutritional composition assessment included: total lipid DHA content, total lipids, DHA/total FA ratio, milk macronutrient content, IFN-gamma, TGF-beta, alpha-tocopherol, retinol, carotenoids (lutein, zeaxanthin, beta-cryptoxanthin, lycopene, carotene). <sup>c</sup> Infant assessments included: weight, length, body composition (calculation of weight and length standard deviation scores (SDS), infant feeding history and status, infant health assessment. <sup>d</sup> At V1, additional samples for hepatitis and human immunodeficiency virus I and II serology. <sup>e</sup> At V3, the safety assessments were limited to activated partial thromboplastin time (aPTT), prothrombin time (PT) and international normalized ratio (INR). 25(OH)D, 25-hydroxyvitamin D; B, baseline; DHA, docosahexaenoic acid; EoS, end of study; FU, follow-up; GA, gestational age; GPL, glycerophospholipids; IFN, interferon gamma; MMN, multiple micronutrients; PC, phone call; R, randomization; TFA, total fatty acids; TGF, transforming growth factor; V, visit; wks, weeks.

**Table 2.** Full list of inclusion and exclusion criteria.

|                    |                                                                                                                                                                                                                                                                                                                                                                                                                                                                                                                                                                                                                                                                                                                                                                                                                                                                                                                                                                                                                                                                                                                                                                                                                                                                                                                                                                                                                                                                                                                                                                                                                                                                                                                                                                                                                                                                       |
|--------------------|-----------------------------------------------------------------------------------------------------------------------------------------------------------------------------------------------------------------------------------------------------------------------------------------------------------------------------------------------------------------------------------------------------------------------------------------------------------------------------------------------------------------------------------------------------------------------------------------------------------------------------------------------------------------------------------------------------------------------------------------------------------------------------------------------------------------------------------------------------------------------------------------------------------------------------------------------------------------------------------------------------------------------------------------------------------------------------------------------------------------------------------------------------------------------------------------------------------------------------------------------------------------------------------------------------------------------------------------------------------------------------------------------------------------------------------------------------------------------------------------------------------------------------------------------------------------------------------------------------------------------------------------------------------------------------------------------------------------------------------------------------------------------------------------------------------------------------------------------------------------------|
| Inclusion criteria | <p style="text-align: center;"><b>Women:</b></p> <ol style="list-style-type: none"><li>1. Healthy pregnant women aged 18–45 years (inclusive) in their third trimester of pregnancy who are expected to give birth to a healthy single full-term infant</li><li>2. Hemoglobin &gt;105 g/L</li><li>3. Intention to breastfeed for at least four months (no more than one bottle or 10% of total milk intake daily as formula)</li><li>4. Omnivorous diet</li><li>5. No intent to take multivitamin supplements, DHA supplements, lutein supplements or any combination of the aforementioned after giving birth except for iodine and iron</li><li>6. Seronegative for human immunodeficiency virus, hepatitis B, and hepatitis C at screening</li><li>7. Pregnant women who, in the opinion of the Investigator, were willing and able to participate in all scheduled visits, to adhere to the study plan, laboratory tests, and all other study related procedures according to the clinical protocol</li><li>8. Pregnant women who provided a personally signed and dated informed consent willing to participate in the study and to adhere to all study procedures including the assessments done to the infant, indicating that they have been informed of all pertinent aspects of the trial and that they understood and accepted these, prior to admission to the study</li></ol> <p style="text-align: center;"><b>Infants:</b></p> <ol style="list-style-type: none"><li>1. Full term/gestational age &gt;37 weeks &lt;43 weeks and birth weight adequate for gestational age</li><li>2. Apgar score at 5 minutes after birth &gt;7</li><li>3. No indication of abnormal neurodevelopment</li></ol>                                                                                                                                                        |
| Exclusion criteria | <p style="text-align: center;"><b>Women:</b></p> <ol style="list-style-type: none"><li>1. Physical (including vital signs, e.g., blood pressure, pulse rate), hematological and clinical-chemical parameters deviating from normal and with clinical relevance in the opinion of the investigator</li><li>2. Any serious infection (acute or chronic) at screening and randomization</li><li>3. Any history of or current metabolic diseases (e.g., diabetes, hypothyroidism, and other metabolic diseases)</li><li>4. Less than 12 months from previous delivery</li><li>5. Any history of or current diseases associated with malabsorption, or other severe diseases of the gastrointestinal tract (e.g. chronic inflammatory bowel disease, iron accumulation, iron utilization disorders)</li><li>6. Any history of or current neurological, cardiac, endocrine or bleeding disorders</li><li>7. Specific diets (e.g., vegan, vegetarian, celiac)</li><li>8. Pre-pregnancy body mass index &lt;18.5 or &gt;30 kg/m<sup>2</sup></li><li>9. Diagnosed or suspected malignant or premalignant disease</li><li>10. Current clinically significant depression</li><li>11. Not willing, or unable for medical reasons to interrupt any intake of pharmaceuticals or dietary supplements which may interact with any of the ingredients of the trial product (i.e. fluoroquinolones, bisphosphonates, levodopa, levothyroxine, penicillamine, antibiotics containing tetracycline or trietidine) during the study supplementation period (from V2 (baseline and randomization) until V4 (end of study))</li><li>12. History of or current diseases where vitamin, mineral, trace element, lutein, or DHA supplementation might be not recommended/contraindicated (such as sickle cell anemia, copper metabolism disorders (Wilson’s disease), renal disease,</li></ol> |

- nephrolithiasis, urolithiasis, hypercalcemia, hypercalciuria, hepatobiliary diseases, existing hypervitaminosis, iron metabolism disorders, hypermagnesemia)
13. Any pregnancy complications or adverse pregnancy outcomes in current pregnancy that may affect micronutrient metabolism or status (e.g. preeclampsia, eclampsia, polyhydramnios, placental insufficiency)
  14. Diagnosed congenital abnormalities in current pregnancy
  15. Known carrier or affected with a genetic disease or condition (e.g. mutation carrier for autosomal recessive diseases)
  16. History of or current abuse of drugs, alcohol or other substances
  17. Current smoker or smoker during current pregnancy
  18. Any history of hypersensitivity or known allergy to any of the ingredients of the study supplement
  19. Incapability of understanding the language in which the study related information was given
  20. Close affiliation with the investigational site, e.g., a close relative of the investigator, dependent person (e.g. employee of the investigational site)
  21. Unwilling or unable to comply with all requirements outlined in the protocol
  22. Women previously screened into the study could not be re-included
  23. Women who were currently participating in a clinical study or who took part in another clinical study during the course of present pregnancy (including nutritional studies and non-interventional studies)

**Infants:**

1. Congenital anomalies
2. Obvious gastrointestinal or metabolic disorders
3. Perinatal hypoxia
4. Preterm birth
5. Very low birth weight (small for gestational age)

---

DHA, docosahexaenoic acid; V, visit.

**Table 3.** Composition of the multiple micronutrients, lutein, and DHA supplement (MMS) compared with the daily dietary intake recommended for lactating women by the Institute of Medicine (IOM) [1].

| <b>Micronutrient, units</b> | <b>MMS soft gel capsule</b> | <b>IOM [1] <sup>1</sup></b> |
|-----------------------------|-----------------------------|-----------------------------|
| Vitamin A, IU               | 3600                        | 4333 (3999)                 |
| Vitamin C, mg               | 60                          | 120 (115)                   |
| Vitamin D, IU               | 600                         | 600                         |
| Vitamin E, IU               | 10                          | 28                          |
| Vitamin B1, mg              | 1.4                         | 1.4                         |
| Vitamin B2, mg              | 1.6                         | 1.6                         |
| Vitamin B3, mg              | 17                          | 17                          |
| Vitamin B5, mg              | 7                           | 7                           |
| Vitamin B6, mg              | 2                           | 2                           |
| Vitamin B12, µg             | 2.8                         | 2.8                         |
| Folic acid, µg              | 500                         | 500                         |
| Biotin, µg                  | 35                          | 35 <sup>2</sup>             |
| Calcium, mg                 | 120                         | 1000 (1300)                 |
| Iodine, µg                  | 225                         | 290                         |
| Iron, mg                    | 9                           | 9 (10)                      |
| Selenium, µg                | 55                          | 70                          |
| Zinc, mg                    | 10                          | 12 (13)                     |
| DHA, mg                     | 200                         | 250 + 100–200 <sup>3</sup>  |
| Lutein, µg                  | 250                         | ND                          |

<sup>1</sup> Specific recommendation for lactating women, value in parentheses indicates specific recommendation for lactating women <19 years old; <sup>2</sup> Average intake; <sup>3</sup> European Food Safety Authority recommendation of 250 mg/day eicosapentaenoic acid + DHA plus 100–200 mg/day DHA for pregnant and lactating women [2]. DHA, docosahexaenoic acid; ND, not determined.

**Table 4.** Efficacy parameters assessed during the trial at V2, V3 and V4.

| <b>Efficacy parameters</b>                                               | <b>Sampling method</b>                                                     |
|--------------------------------------------------------------------------|----------------------------------------------------------------------------|
| <b>Maternal blood biomarkers</b>                                         |                                                                            |
| FA in GPL                                                                | GC                                                                         |
| DHA/TFA ratio                                                            | GC                                                                         |
| IFN-gamma                                                                | ELISA                                                                      |
| TGF-beta                                                                 | ELISA                                                                      |
| Folic acid                                                               | ECL                                                                        |
| Vitamin B12                                                              | ECL                                                                        |
| Homocysteine                                                             | LC-MS                                                                      |
| 25(OH)D                                                                  | ECL                                                                        |
| Alpha tocopherol and retinol                                             | HPLC                                                                       |
| Carotenoids (lutein, zeaxanthin, beta-cryptoxanthin, lycopene, carotene) | HPLC                                                                       |
| <b>Maternal milk composition</b>                                         |                                                                            |
| Total lipids                                                             | GC                                                                         |
| %DHA/TFA ratio                                                           | GC                                                                         |
| Milk macronutrient content                                               | Spectroscopy                                                               |
| IFN-gamma                                                                | ELISA                                                                      |
| TGF-beta                                                                 | ELISA                                                                      |
| Alpha tocopherol and retinol                                             | HPLC                                                                       |
| Carotenoids (lutein, zeaxanthin, beta-cryptoxanthin, lycopene, carotene) | HPLC                                                                       |
| <b>Other maternal variables</b>                                          |                                                                            |
| Weight, height and body mass index                                       | —                                                                          |
| Wellbeing/Fatigue                                                        | Validated multidimensional assessment of fatigue (MAF) questionnaire [3,4] |
| Nutritional status                                                       | Food frequency questionnaire [5] <sup>a</sup>                              |
| <b>Exploratory variables</b>                                             |                                                                            |
| Infant weight and length                                                 | —                                                                          |
| Infant feeding                                                           | —                                                                          |
| Infant health history                                                    | —                                                                          |
| Body composition (SDS)                                                   | —                                                                          |

<sup>a</sup> Focus on foods providing lutein and DHA. 25(OH)D, 25-hydroxyvitamin D; DHA, docosahexaenoic acid; ECL, electro-chemiluminescence immunoassay; ELISA, enzyme-linked immunosorbent assay; FA, fatty acids; GC, gas chromatography; GPL, glycerophospholipids; HPLC, high-performance liquid chromatography; IFN, interferon; LC-MS, liquid chromatography-mass spectrometry; SDS, calculation of weight and length standard deviation scores; TFA, total fatty acids; TGF, transforming growth factor; V, visit.

**Table 5.** Primary and secondary maternal efficacy endpoints with changes reported from V2 to V4 (per protocol population, LOCF approach).

| Parameters               | Placebo (n = 33)<br>Mean±SD (range) | MMS (n = 32)<br>Mean±SD (range) | LS mean difference<br>(95% CI) <sup>1</sup> | P value *         |
|--------------------------|-------------------------------------|---------------------------------|---------------------------------------------|-------------------|
| <b>Milk parameters:</b>  |                                     |                                 |                                             |                   |
| DHA (wt% TFA)            | -0.05±0.11                          | 0.11±0.12                       | 0.15                                        | <b>&lt;0.0001</b> |
| (primary)                | (-0.32 to 0.22)                     | (-0.23 to 0.32)                 | (0.11–0.19)                                 |                   |
| ALA, %                   | -0.08±0.54                          | -0.07±0.45                      | -0.10                                       | 0.3064            |
|                          | (-1.44 to 1.28)                     | (-1.38 to 1.28)                 | (-0.30 to 0.09)                             |                   |
| Arachidonic acid, %      | -0.01±0.07                          | -0.05±0.07                      | -0.02                                       | 0.1710            |
|                          | (-0.14 to 0.26)                     | (-0.24 to 0.09)                 | (-0.06 to 0.01)                             |                   |
| Decanoic acid, %         | -0.11±0.38                          | -0.11±0.47                      | -0.0007                                     | 0.9934            |
|                          | (-0.83 to 0.54)                     | (-1.42 to 0.55)                 | (-0.1667 to 0.1653)                         |                   |
| DGLA, %                  | -0.07±0.08                          | -0.08±0.08                      | -0.02                                       | 0.2086            |
|                          | (-0.38 to 0.10)                     | (-0.38 to 0.10)                 | (-0.05 to 0.01)                             |                   |
| Docosanoic acid, %       | -0.011±0.089                        | 0.002±0.076                     | -0.004                                      | 0.8293            |
|                          | (-0.22 to 0.15)                     | (-0.22 to 0.14)                 | (-0.037 to 0.030)                           |                   |
| DPA (n-3), %             | 0.006±0.065                         | -0.004±0.041                    | -0.011                                      | 0.3333            |
|                          | (-0.09 to 0.32)                     | (-0.18 to 0.06)                 | (-0.035 to 0.012)                           |                   |
| DPA (n-6), %             | -0.007±0.035                        | 0.008±0.045                     | 0.015                                       | 0.0514            |
|                          | (-0.10 to 0.09)                     | (-0.08 to 0.16)                 | (-0.00009 to 0.02993)                       |                   |
| Docosatetraenoic acid, % | -0.001±0.022                        | -0.012±0.017                    | -0.0086                                     | 0.0634            |
|                          | (-0.03 to 0.07)                     | (-0.07 to 0.01)                 | (-0.0177 to 0.0005)                         |                   |
| Eicosadienoic acid, %    | -0.04±0.06                          | -0.03±0.05                      | 0.006                                       | 0.5808            |
|                          | (-0.19 to 0.09)                     | (-0.14 to 0.09)                 | (-0.016 to 0.028)                           |                   |
| EPA, %                   | 0.01±0.04                           | 0.01±0.03                       | 0.0110                                      | <b>0.0380</b>     |
|                          | (-0.11 to 0.06)                     | (-0.06 to 0.06)                 | (0.0006–0.0214)                             |                   |
| Eicosatrienoic acid, %   | -0.012±0.015                        | -0.006±0.016                    | -0.00003                                    | 0.9933            |
|                          | (-0.04 to 0.02)                     | (-0.04 to 0.04)                 | (-0.00599 to 0.00594)                       |                   |
| Eicosenoic acid, %       | -0.05±0.09                          | -0.03±0.09                      | 0.002                                       | 0.9045            |
|                          | (-0.28 to 0.16)                     | (-0.17 to 0.22)                 | (-0.037 to 0.042)                           |                   |
| GLA, %                   | -0.006±0.043                        | -0.016±0.029                    | -0.012                                      | 0.1429            |
|                          | (-0.10 to 0.11)                     | (-0.08 to 0.03)                 | (-0.028 to 0.004)                           |                   |
| Heptadecanoic acid, %    | 0.011±0.057                         | 0.008±0.056                     | -0.003                                      | 0.8224            |
|                          | (-0.11 to 0.12)                     | (-0.13 to 0.16)                 | (-0.026 to 0.021)                           |                   |
| Linoleic acid, %         | 0.09±2.98                           | 0.27±3.05                       | 0.26                                        | 0.6672            |
|                          | (-8.32 to 5.81)                     | (-6.27 to 10.32)                | (-0.96 to 1.49)                             |                   |
| Mead acid, %             | 0.019±0.054                         | -0.004±0.015                    | -0.022                                      | <b>0.0243</b>     |
|                          | (-0.03 to 0.19)                     | (-0.07 to 0.01)                 | (-0.040 to -0.003)                          |                   |
| Lauric acid, %           | -0.06±1.83                          | -0.01±2.32                      | 0.06                                        | 0.8866            |
|                          | (-3.51 to 4.65)                     | (-6.37 to 5.28)                 | (-0.82 to 0.95)                             |                   |
| Myristic acid, %         | 0.41±1.98                           | 0.25±2.36                       | -0.11                                       | 0.8248            |
|                          | (-3.21 to 6.00)                     | (-4.57 to 5.26)                 | (-1.12 to 0.89)                             |                   |
| Myristoleic acid, %      | -0.005±0.100                        | -0.008±0.099                    | -0.002                                      | 0.9099            |
|                          | (-0.23 to 0.18)                     | (-0.26 to 0.20)                 | (-0.045 to 0.040)                           |                   |
| Octanoic acid, %         | 0.009±0.121                         | -0.018±0.093                    | -0.024                                      | 0.3191            |
|                          | (-0.12 to 0.59)                     | (-0.24 to 0.18)                 | (-0.071 to 0.024)                           |                   |
| Oleic acid, %            | -0.25±3.65                          | -0.11±4.00                      | -0.05                                       | 0.9436            |
|                          | (-6.19 to 7.28)                     | (-9.36 to 7.55)                 | (-1.52 to 1.42)                             |                   |
| Palmitic acid, %         | 0.15±2.61                           | 0.37±2.71                       | -0.29                                       | 0.6001            |
|                          | (-6.39 to 4.44)                     | (-6.37 to 4.28)                 | (-1.39 to 0.81)                             |                   |

| Parameters                       | Placebo (n = 33)                 | MMS (n = 32)                      | LS mean difference             | P value *         |
|----------------------------------|----------------------------------|-----------------------------------|--------------------------------|-------------------|
|                                  | Mean±SD (range)                  |                                   | (95% CI) <sup>1</sup>          |                   |
| Palmitoleic acid, %              | -0.009±0.598<br>(-1.00 to 2.02)  | -0.139±0.728<br>(-1.98 to 1.45)   | -0.0006<br>(-2.8666 to 0.2854) | 0.9967            |
| Pentadecanoic acid,<br>%         | -0.035±0.106<br>(-0.13 to 0.24)  | -0.005±0.116<br>(-0.32 to 0.23)   | -0.035<br>(-0.086 to 0.0157)   | 0.1710            |
| Stearic acid, %                  | 0.10±2.64<br>(-7.40 to 6.22)     | 0.47±2.06<br>(-3.87 to 8.62)      | 0.01<br>(-0.84 to 0.87)        | 0.9792            |
| Tetracosanoic acid,<br>%         | -0.006±0.025<br>(-0.05 to 0.08)  | -0.009±0.025<br>(-0.11 to 0.03)   | -0.005<br>(-0.015 to 0.006)    | 0.3752            |
| Trans-docosenoic<br>acid, %      | -0.003±0.036<br>(-0.09 to 0.11)  | -0.004±0.027<br>(-0.06 to 0.09)   | -0.008<br>(-0.012 to 0.005)    | 0.2319            |
| Trans-palmitoleic<br>acid, %     | 0.005±0.023<br>(-0.04 to 0.06)   | -0.001±0.021<br>(-0.06 to 0.04)   | -0.004<br>(-0.013 to 0.005)    | 0.3896            |
| Trans/trans-linoleic<br>acid, %  | 0.021±0.052<br>(-0.05 to 0.19)   | 0.004±0.043<br>(-0.13 to 0.08)    | -0.015<br>(-0.004 to 0.007)    | 0.1813            |
| Transoctadecenoic<br>acid, %     | -0.05±0.16<br>(-0.55 to 0.13)    | 0.01±0.10<br>(-0.36 to 0.29)      | 0.02<br>(-0.01 to 0.06)        | 0.1706            |
| Tridecanoic acid, %              | 0.012±0.028<br>(-0.04 to 0.09)   | 0.004±0.022<br>(-0.04 to 0.07)    | -0.010<br>(-0.021 to 0.001)    | 0.0773            |
| Vaccenic acid, %                 | 0.05±0.27<br>(-0.46 to 0.58)     | -0.07±0.30<br>(-0.75 to 0.55)     | -0.01<br>(-0.14 to 0.11)       | 0.8400            |
| Total lipids – M1,<br>g/100 mL   | -0.59±1.71<br>(-4.5 to 2.5)      | -0.16±2.05<br>(-4.0 to 5.8)       | 0.43<br>(-0.28 to 1.15)        | 0.2315            |
| Total lipids – M2,<br>g/100 mL   | -0.57±1.97<br>(-4.2 to 3.4)      | -0.25±2.29<br>(-4.2 to 6.2)       | 0.53<br>(-0.28 to 1.35)        | 0.1976            |
| Total lipids – mean,<br>g/100 mL | -0.58±1.82<br>(-4.4 to 2.7)      | -0.21±2.16<br>(-4.0 to 6.0)       | 0.48<br>(-0.28 to 1.24)        | 0.2082            |
| TGF-β2, pg/mL                    | 249.5±3246.3<br>(-6760 to 15375) | 460.3±4436.3<br>(-13966 to 15655) | 717.13<br>(-749.52 to 2183.78) | 0.3322            |
| Alpha tocopherol,<br>µg/mL       | -0.80±2.71<br>(-7.39 to 4.13)    | -0.64±2.78<br>(-5.30 to 6.82)     | 0.32<br>(-0.70 to 1.35)        | 0.5315            |
| Vitamin A (retinol),<br>µg/mL    | -0.17±0.42<br>(-1.23 to 0.76)    | -0.16±0.38<br>(-0.91 to 0.79)     | 0.02<br>(-0.12 to 0.16)        | 0.7285            |
| Lutein, ng/mL                    | -5.0±21.2<br>(-44.0 to 41.0)     | 0.1±24.4<br>(-47.0 to 57.0)       | 5.7<br>(-4.4 to 15.8)          | 0.2636            |
| Beta carotene,<br>ng/mL          | -5.1±17.2<br>(-48.0 to 28.0)     | 22.7±34.5<br>(-20.0 to 142.0)     | 28.4<br>(15.0-41.9)            | <b>&lt;0.0001</b> |
| Beta-cryptoxanthin,<br>ng/mL     | -7.0±13.0<br>(-43.0 to 18.0)     | -3.5±14.5<br>(-35.0 to 33.0)      | 2.2<br>(-2.7 to 7.2)           | 0.3757            |
| Lycopene, ng/mL                  | -0.8±9.8<br>(-19.0 to 22.0)      | -2.7±8.7<br>(-19.0 to 19.0)       | 0.4<br>(-3.4 to 4.1)           | 0.8398            |
| Zeaxanthin, ng/mL                | -1.9±7.8<br>(-23.0 to 13.0)      | -0.1±9.0<br>(-18.0 to 34.0)       | 1.2<br>(-2.3 to 4.7)           | 0.4944            |
| Carbohydrate – M1,<br>g/100 mL   | -0.16±0.39<br>(-1.1 to 0.5)      | -0.21±0.89<br>(-4.6 to 0.5)       | -0.10<br>(-0.42 to 0.21)       | 0.5203            |
| Carbohydrate – M2,<br>g/100 mL   | -0.12±0.39<br>(-1.0 to 0.6)      | -0.21±0.85<br>(-4.3 to 0.7)       | -0.12<br>(-0.41 to 0.18)       | 0.4247            |
| Carbohydrate –<br>Mean, g/100 mL | -0.14±0.38<br>(-1.0 to 0.5)      | -0.21±0.87<br>(-4.5 to 0.5)       | -0.11<br>(-0.42 to 0.19)       | 0.4717            |



| Parameters                       | Placebo (n = 33)                | MMS (n = 32)                    | LS mean difference<br>(95% CI) <sup>1</sup> | P value *         |
|----------------------------------|---------------------------------|---------------------------------|---------------------------------------------|-------------------|
|                                  | Mean±SD (range)                 |                                 |                                             |                   |
| Energy – M1, g/100 mL            | -7.1±16.1<br>(-44.0 to 20.0)    | -2.2±19.8<br>(-41.0 to 60.0)    | 4.67<br>(-2.36 to 11.70)                    | 0.1891            |
| Energy – M2, g/100 mL            | -6.9±19.6<br>(-42.0 to 30.0)    | -3.4±21.9<br>(-45.0 to 65.0)    | 5.46<br>(-2.48 to 13.40)                    | 0.1744            |
| Energy – Mean, g/100 mL          | -7.0±17.2<br>(-43.0 to 24.0)    | -2.8±20.7<br>(-41.0 to 63.0)    | 5.06<br>(-2.36 to 12.48)                    | 0.1776            |
| Protein (crude) – M1, g/100 mL   | -0.23±0.27<br>(-1.3 to 0.2)     | -0.04±1.01<br>(-1.0 to 5.3)     | 0.21<br>(-0.14 to 0.57)                     | 0.2377            |
| Protein (crude) – M2, g/100 mL   | -0.23±0.23<br>(-0.9 to 0.3)     | -0.04±1.03<br>(-0.5 to 5.5)     | 0.22<br>(-0.15 to 0.59)                     | 0.2350            |
| Protein (crude) – Mean, g/100 mL | -0.23±0.24<br>(-1.1 to 0.2)     | -0.04±1.01<br>(-0.8 to 5.4)     | 0.22<br>(-0.14 to 0.58)                     | 0.2318            |
| Protein (true) – M1, g/100 mL    | -0.18±0.23<br>(-1.0 to 0.2)     | -0.03±0.82<br>(-0.8 to 4.3)     | 0.17<br>(-0.12 to 0.46)                     | 0.2454            |
| Protein (true) – M2, g/100 mL    | -0.18±0.20<br>(-0.7 to 0.2)     | -0.01±0.86<br>(-0.5 to 4.6)     | 0.20<br>(-0.11 to 0.51)                     | 0.2050            |
| Protein (true) – Mean, g/100 mL  | -0.18±0.20<br>(-0.9 to 0.2)     | -0.02±0.83<br>(-0.6 to 4.5)     | 0.18<br>(-0.12 to 0.48)                     | 0.2239            |
| TS – M1, g/100 mL                | -0.96±1.81<br>(-5.0 to 2.1)     | -0.40±2.21<br>(-5.1 to 6.5)     | 0.55<br>(-0.26 to 1.35)                     | 0.1804            |
| TS – M2, g/100 mL                | -0.92±2.07<br>(-4.7 to 2.8)     | -0.51±2.43<br>(-5.8 to 7.5)     | 0.65<br>(-0.26 to 1.55)                     | 0.1587            |
| TS – Mean, g/100 mL              | -0.94±1.92<br>(-4.9 to 2.3)     | -0.46±2.31<br>(-5.3 to 7.0)     | 0.60<br>(-0.25 to 1.44)                     | 0.1649            |
| <b>Blood parameters:</b>         |                                 |                                 |                                             |                   |
| ALA, mg/L                        | -0.89±1.75<br>(-6.21 to 2.0)    | -0.33±2.17<br>(-6.4 to 5.9)     | 0.16<br>(-0.63 to 0.94)                     | 0.6902            |
| Arachidonic acid, mg/L           | -13.70±20.57<br>(-55.9 to 26.7) | -15.48±15.20<br>(-38.8 to 18.5) | -3.46<br>(-10.78 to 3.86)                   | 0.3487            |
| DGLA, mg/L                       | -7.72±10.17<br>(-41.8 to 10.4)  | -5.45±10.44<br>(-24.2 to 21.9)  | -0.26<br>(-4.87 to 4.35)                    | 0.9113            |
| DHA, mg/L                        | -9.76±8.98<br>(-37.0 to 6.9)    | 7.14±11.40<br>(-29.0 to 28.1)   | 15.66<br>(11.96–19.36)                      | <b>&lt;0.0001</b> |
| DPA (n-3), mg/L                  | -1.24±2.51<br>(-7.8 to 2.8)     | -0.94±2.62<br>(-6.3 to 7.4)     | -0.53<br>(-1.66 to 0.59)                    | 0.34555           |
| DPA (n-6), mg/L                  | -1.11±1.23<br>(-4.4 to 0.5)     | -0.83±1.28<br>(-4.6 to 1.6)     | 0.01<br>(-0.39 to 0.42)                     | 0.9412            |
| Docosatetraenoic acid, mg/L      | -0.44±1.08<br>(-3.9 to 1.9)     | -0.70±0.87<br>(-2.2 to 1.8)     | -0.46<br>(-0.86 to -0.05)                   | <b>0.0270</b>     |
| Eicosadienoic acid, mg/L         | -0.92±1.07<br>(-3.5 to 1.4)     | -0.68±0.91<br>(-2.4 to 1.6)     | -0.007<br>(-0.366 to 0.352)                 | 0.9691            |
| Eicosanoic acid, mg/L            | -0.37±0.87<br>(-3.3 to 1.2)     | -0.28±0.82<br>(-2.2 to 1.2)     | 0.08<br>(-0.30 to 0.46)                     | 0.6774            |
| EPA, mg/L                        | -2.84±4.27<br>(-11.2 to 4.6)    | 0.59±4.48<br>(-10.6 to 13.5)    | 2.21<br>(0.44–3.98)                         | <b>0.0155</b>     |
| Eicosatrienoic acid (n-3), mg/L  | -0.42±0.62<br>(-1.6 to 0.6)     | -0.33±0.52<br>(-1.6 to 1.3)     | 0.05<br>(-0.22 to 0.31)                     | 0.7212            |
| Eicosenoic acid, mg/L            | -0.24±0.52<br>(-1.3 to 0.9)     | -0.19±0.43<br>(-1.1 to 0.9)     | -0.03<br>(-0.24 to 0.19)                    | 0.7892            |

| Parameters                      | Placebo (n = 33)                    | MMS (n = 32)                        | LS mean difference           | P value *         |
|---------------------------------|-------------------------------------|-------------------------------------|------------------------------|-------------------|
|                                 | Mean±SD (range)                     |                                     | (95% CI) <sup>1</sup>        |                   |
| GLA, mg/L                       | -0.28±0.98<br>(-2.7 to 2.1)         | -0.5±0.69<br>(-1.5 to 2.1)          | -0.10<br>(-0.41 to 0.22)     | 0.5445            |
| Heptadecanoic acid, mg/L        | -0.49±0.86<br>(-2.2 to 1.6)         | -0.40±0.69<br>(-1.9 to 0.9)         | -0.02<br>(-0.34 to 0.29)     | 0.8908            |
| Linoleic acid, mg/L             | -31.26±61.87<br>(-193.1 to 80.3)    | -25.11±44.50<br>(-118.0 to 68.0)    | -2.42<br>(-22.90 to 18.05)   | 0.8137            |
| Mead acid, mg/L                 | -0.72±1.20<br>(-3.0 to 2.4)         | -0.49±0.99<br>(-2.1 to 1.9)         | 0.03<br>(-0.41 to 0.47)      | 0.8865            |
| Myristic acid, mg/L             | -1.14±2.16<br>(-7.2 to 2.8)         | -0.69±3.26<br>(-6.6 to 8.6)         | 0.06<br>(-1.03 to 1.15)      | 0.9108            |
| Myristoleic acid, mg/L          | -0.06±0.22<br>(-0.6 to 0.4)         | 0.02±0.29<br>(-0.7 to 0.5)          | 0.02<br>(-0.09 to 0.13)      | 0.7206            |
| Oleic acid, mg/L                | -18.69±33.19<br>(-113.3 to 35.5)    | -12.07±25.96<br>(-56.1 to 86.1)     | -1.07<br>(-13.07 to 10.94)   | 0.8598            |
| Palmitic acid, mg/L             | -2.01±3.03<br>(-9.2 to 3.9)         | -1.84±2.79<br>(-7.7 to 6.2)         | -0.04<br>(-1.28 to 1.20)     | 0.9495            |
| Pentadecanoic acid, mg/L        | -0.15±0.28<br>(-1.0 to 0.4)         | -0.13±0.32<br>(-1.3 to 0.4)         | -0.02<br>(-0.14 to 0.10)     | 0.7132            |
| Stearic acid, mg/L              | -27.15±38.37<br>(-119.7 to 33.2)    | -8.88±28.76<br>(-64.3 to 42.4)      | 9.33<br>(-4.14 to 22.80)     | 0.1712            |
| Trans-docosenoic acid, mg/L     | -0.71±1.67<br>(-6.3 to 2.8)         | -0.10±1.74<br>(-5.6 to 2.7)         | 0.47<br>(-0.19 to 1.12)      | 0.1598            |
| Trans-palmitoleic acid, mg/L    | -0.08±0.12<br>(-0.3 to 0.2)         | -0.02±0.15<br>(-0.4 to 0.3)         | 0.06<br>(-0.01 to 0.13)      | 0.0942            |
| Trans/trans-linoleic acid, mg/L | -0.06±0.39<br>(-0.9 to 1.2)         | 0.10±0.99<br>(-1.3 to 5.0)          | 0.16<br>(-0.20 to 0.51)      | 0.3898            |
| Transoctadecenoic acid, mg/L    | -0.15±0.55<br>(-1.1 to 1.5)         | -0.12±0.45<br>(-1.2 to 0.8)         | -0.04<br>(-0.24 to 0.17)     | 0.7138            |
| Vaccenic acid, mg/L             | -2.43±2.57<br>(-7.6 to 3.1)         | -2.57±2.48<br>(-7.7 to 3.2)         | -0.30<br>(-1.39 to 0.78)     | 0.5912x           |
| DHA/TFA                         | -0.004±0.007<br>(-0.008 to -0.001)  | 0.009±0.009<br>(-0.02 to 0.03)      | 0.013<br>(0.010-0.016)       | <b>&lt;0.0001</b> |
| TFA, mg/L                       | -180.98±207.73<br>(-638.5 to 151.8) | -109.22±152.81<br>(-419.5 to 297.6) | 23.17<br>(-48.07 to 94.41)   | 0.5180            |
| IFN-γ, pg/mL                    | -1.42±3.32<br>(-11.1 to 1.2)        | -0.69±3.19<br>(-11.8 to 2.3)        | 0.44<br>(-0.40 to 1.29)      | 0.3000            |
| TGF-β2, pg/mL                   | 42.78±200.07<br>(-571.9 to 483.4)   | 25.63±327.89<br>(-386.3 to 1100.6)  | 38.37<br>(-104.67 to 181.40) | 0.5889            |
| Folic acid, ng/mL               | -1.73±4.73<br>(-11.6 to 16.5)       | 17.82±9.51<br>(11.70-23.80)         | 21.20<br>(17.84-24.56)       | <b>&lt;0.0001</b> |
| Vitamin B12, pg/mL              | -17.9±97.0<br>(-313.0 to 342.0)     | 69.0±135.7<br>(-190.0 to 510.0)     | 89.89<br>(31.45-148.3)       | <b>0.0031</b>     |
| Homocysteine A2, μM             | 0.56±1.47<br>(-3.51 to 3.72)        | -1.08±1.24<br>(-4.24 to 1.71)       | -1.63<br>(-2.27 to -0.99)    | <b>&lt;0.0001</b> |
| 25-OH-vitamin D, ng/mL          | -1.02±8.18<br>(-7.5 to 5.50)        | 5.88±9.98<br>(-8.4 to 28.9)         | 7.82<br>(4.36-11.28)         | <b>&lt;0.0001</b> |
| Alpha-tocopherol, μg/mL         | -2.37±2.32<br>(-8.5 to 2.0)         | -1.31±1.86<br>(-6.8 to 2.2)         | 0.61<br>(-0.22 to 1.43)      | 0.4151            |

| Parameters                    | Placebo (n = 33)                 | MMS (n = 32)                      | LS mean difference          | P value *         |
|-------------------------------|----------------------------------|-----------------------------------|-----------------------------|-------------------|
|                               | Mean±SD (range)                  |                                   | (95% CI) <sup>1</sup>       |                   |
| Vitamin A (retinol),<br>µg/mL | -0.03±0.09<br>(-0.22 to 0.18)    | 0.02±0.10<br>(-0.18 to 0.36)      | 0.03<br>(-0.01 to 0.047)    | 0.1222            |
| Beta carotene,<br>ng/mL       | -49.3±160.3<br>(-443.0 to 222.0) | 223.3±334.2<br>(-480.0 to 1182.0) | 296.35<br>(183.06–409.64)   | <b>&lt;0.0001</b> |
| Beta-cryptoxanthin,<br>ng/mL  | -47.1±84.1<br>(-312.0 to 15.0)   | -28.8±63.4<br>(-206.0 to 66.0)    | 4.32<br>(-11.44 to 20.08)   | 0.5856            |
| Lutein, ng/mL                 | -16.8±33.1<br>(-91.0 to 40.0)    | 5.8±52.2<br>(-182.0 to 90.0)      | 21.13<br>(4.15–38.31)       | <b>0.0157</b>     |
| Lycopene, ng/mL               | -22.5±106.6<br>(-353.0 to 242.0) | -65.9±145.9<br>(-472.0 to 192)    | -17.26<br>(-57.29 to 22.76) | 0.3919            |
| Zeaxanthin, ng/mL             | -4.9±11.1<br>(-31.0 to 13.0)     | -1.5±16.5<br>(-55.0 to 30.0)      | 2.65<br>(-2.45 to 7.76)     | 0.3026            |

\* Significant differences (i.e., p<0.05; two-sided) indicated in bold. ALA, alpha linoleic acid; DGLA, dihomo-gamma-linoleic acid; DHA, docosahexaenoic acid; DPA, docosapentaenoic acid; GLA, gamma linoleic acid; IFN-γ, interferon gamma; LS, least squares; MMS, multiple micronutrients, lutein, and DHA supplement; SD, standard deviation; TFA, total fatty acids; TGF, transforming growth factor; TS, total carbohydrate solids; V, visit.

**Table S6.** Results of the food frequency questionnaire at V2 and V4 (per protocol population), with comparison to recommended dietary allowance (RDA). Values in bold fall below the RDA.

| Daily intake            | Placebo ( <i>n</i> = 33), mean±SD (range) |                                        | MMS ( <i>n</i> = 32), mean±SD (range)  |                                       | IOM [1] <sup>a</sup>     |
|-------------------------|-------------------------------------------|----------------------------------------|----------------------------------------|---------------------------------------|--------------------------|
|                         | V2                                        | V4                                     | V2                                     | V4                                    |                          |
| Energy, kcal            | <b>2108.9±697.5</b><br>(1279.0–3915.0)    | <b>1929.6±645.4</b><br>(1029.0–3733.0) | <b>2377.6±1035.2</b><br>(882.0–5053.0) | <b>2066.7±747.5</b><br>(949.0–4066.0) | 2733–2803<br>(2698–2768) |
| Carbohydrate – total, g | 266.7±89.1<br>(165.0–496.0)               | 249.7±87.9<br>(145.0–518.0)            | 306.1±145.4<br>(81.0–680.0)            | 268.6±104.9<br>(109.0–548.0)          | 210                      |
| Cholesterol, mg         | 257.1±104.4<br>(110.0–484.0)              | 228.9±81.2<br>(101.0–382.0)            | 287.7±152.3<br>(119.0–781.0)           | 243.8±89.6<br>(113.0–528.0)           | ALAP                     |
| Englyst fiber – NSP, g  | 29.5±12.2<br>(12.6–60.1)                  | <b>27.6±11.1</b><br>(12.8–57.0)        | 34.4±19.9<br>(6.5–105.1)               | 31.2±15.0<br>(10.2–75.7)              | 29 <sup>b</sup>          |
| Fat – total, g          | 72.2±27.5<br>(36.0–135.0)                 | 63.6±26.4<br>(29.0–127.0)              | 78.5±35.7<br>(31.0–179.0)              | 66.5±25.2<br>(31.0–139.0)             | ND                       |
| Protein, g              | 77.6±26.4<br>(42.8–140.3)                 | <b>69.7±20.0</b><br>(36.6–113.1)       | 87.7±35.9<br>(31.6–203.2)              | 76.7±26.3<br>(38.3–138.8)             | 71                       |
| Alcohol, g              | 0.4±0.64 (0.0–2.6)                        | 0.9±1.44 (0.0–5.6)                     | 0.5±1.03 (0.0–5.2)                     | 0.5±1.07 (0.0–5.6)                    | —                        |
| Calcium, mg             | <b>685.9±253.2</b><br>(380.0–1322.0)      | <b>597.2±231.4</b><br>(212.0–1122.0)   | <b>778.8±378.3</b><br>(259.0–1993.0)   | <b>658.5±281.8</b><br>(233.0–1233.0)  | 1000 (1300)              |
| Chloride, mg            | 3702.1±1500.8<br>(1589.0–6479.0)          | 3517.0±1317.8<br>(1274.0–5706.0)       | 3772.1±1932.2<br>(1433.0–10391.0)      | 3445.0±1562.9<br>(1245.0–7727.0)      | 2300 <sup>b</sup>        |
| Copper, µg              | 1866.2±596.8<br>(922.0–3223.0)            | 1779.5±581.0<br>(1019.0–3220)          | 2289.8±1020.3<br>(866.0–5242.0)        | 2035.2±805.9<br>(1012.0–4053.0)       | 1300                     |
| Iron, mg                | 22.2±17.9<br>(7.4–111.0)                  | 19.1±9.6<br>(6.0–44.2)                 | 44.5±77.5<br>(5.8–436.5)               | 58.9±184.4<br>(6.7–1042.4)            | 9 (10)                   |
| Iodine, µg              | <b>173.3±93.1</b><br>(47.0–327.0)         | <b>173.4±124.2</b><br>(38.0–594.0)     | <b>226.8±120.8</b><br>(39.0–570.0)     | <b>161.7±98.7 *</b><br>(50.0–397.0)   | 290                      |
| Magnesium, mg           | 509.4±496.2<br>(196.0–2951)               | 439.0±169.3<br>(185.0–2884)            | 532.4±373.2<br>(154.0–2105.0)          | 416.3±239.1<br>(162.0–1320.0)         | 310–320 (360)            |
| Manganese, µg           | 5706.8±2685.8<br>(1761.0–14061.0)         | 5219.8±2559.0<br>(2369.0–14001.0)      | 6469.3±3191.9<br>(2160.0–15052.0)      | 5476.1±2532.7<br>(2294.0–13965.0)     | 2600 <sup>b</sup>        |

| Daily intake                        | Placebo (n = 33), mean±SD (range)    |                                      | MMS (n = 32), mean±SD (range)        |                                      | IOM [1] <sup>a</sup> |
|-------------------------------------|--------------------------------------|--------------------------------------|--------------------------------------|--------------------------------------|----------------------|
|                                     | V2                                   | V4                                   | V2                                   | V4                                   |                      |
| Sodium, mg                          | 2102.7±806.8<br>(952.0–3547.0)       | 1974.0±712.8<br>(721.0–3156.0)       | 2159.7±1041.4<br>(788.0–5686.0)      | 1942.2±866.5<br>(799.0–4266.0)       | 1500 <sup>b</sup>    |
| Phosphorus, mg                      | 1224.4±423.3<br>(721.0–2458.0)       | 1104.3±328.4<br>(605.0–1976.0)       | 1387.7±583.4<br>(529.0–3101.0)       | 1230.0±446.2<br>(609.0–2171.0)       | 700 (1250)           |
| Zinc, mg                            | 12.2±4.3<br>(6.3–22.6)               | <b>11.3±4.6</b><br>(4.9–26.4)        | 15.2±6.5<br>(4.7–31.1)               | 13.5±6.3<br>(6.0–28.5)               | 12 (13)              |
| Vitamin A – retinol, mg             | 1.34±1.69<br>(0.13–6.23)             | 1.32±1.67<br>(0.13–6.16)             | <b>0.99±0.64</b><br>(0.17–2.29)      | 1.39±1.68<br>(0.14–6.07)             | 1.3 (1.2)            |
| Vitamin C, mg                       | 254.2±89.9<br>(91.0–406.0)           | 245.4±109.7<br>(78.0–458.0)          | 318.5±219.7<br>(54.0–1312.0)         | 290.6±169.1<br>(29.0–697.0)          | 120 (115)            |
| Vitamin D –<br>ergocalciferol, µg   | <b>12.8±10.7</b><br>(0.6–33.7)       | <b>13.2±15.5</b><br>(0.4–68.0)       | <b>14.9±11.2</b><br>(0.7–42.2)       | <b>11.3±11.1</b><br>(0.7–42.3)       | 15 [6]               |
| Vitamin E – alpha<br>tocopherol, mg | <b>15.8±6.8</b><br>(5.9–32.4)        | <b>15.3±7.6</b><br>(5.3–33.9)        | <b>17.0±7.0</b><br>(5.1–31.7)        | <b>15.1±8.9</b><br>(4.4–40.4)        | 19                   |
| Vitamin B1, mg                      | 2.93±1.81<br>(0.82–7.28)             | 2.88±1.89<br>(0.61–7.02)             | 3.37±1.93<br>(0.72–8.00)             | 2.73±2.04<br>(0.72–9.35)             | 1.4                  |
| Vitamin B2, mg                      | 2.19±0.95<br>(0.93–5.52)             | 2.18±1.17<br>(0.63–5.98)             | 2.61±1.19<br>(0.71–6.07)             | 2.32±1.40<br>(0.78–6.18)             | 1.6                  |
| Vitamin B3, µg                      | 39861.1±12284.3<br>(19426.0–70599.0) | 38495.5±14109.1<br>(15777.0–72397.0) | 45984.2±16574.9<br>(13858.0–96414.0) | 39908.2±15564.7<br>(17538.0–69969.0) | 17000                |
| Vitamin B6, mg                      | 3.87±2.24<br>(1.10–9.70)             | 3.93±2.44<br>(0.86–9.55)             | 4.50±2.85<br>(1.00–11.69)            | 3.68±2.79<br>(1.03–12.91)            | 2                    |
| Vitamin B12, µg                     | 9.26±7.80<br>(1.8–29.8)              | 9.02±8.33<br>(1.2–30.8)              | 11.34±10.26<br>(1.2–43.4)            | 8.53±9.06<br>(1.6–41.2)              | 2.8                  |
| Folate – Total, µg                  | 777.0±347.2<br>(206.0–1294.0)        | 810.0±561.4<br>(168.0–3034.0)        | 1080.9±584.4<br>(176.0–2215.0)       | 799.8±525.1<br>(106.0–2051.0)        | 500                  |

\* Significantly greater reduction in iodine intake from V2 to V4 with MMS vs. placebo (least squares mean difference –47.02 (95% confidence interval –90.25 to –3.79; p=0.0335).

<sup>a</sup> Specific recommendation for lactating women, value in parentheses indicates specific recommendation for lactating women <19 years old; <sup>b</sup> average intake. ALAP, as low as possible; IOM, institute of Medicine; MMS, multiple micronutrients, lutein, and DHA supplement; ND, not determined; NSP, non-starch polysaccharides; SD, standard deviation; V, visit.

**Table S7.** Exploratory infant parameters: weight and length as well as weight/length WHO z-score-for-age values at V2 and V4 and regression analysis <sup>a</sup> (per protocol population)

| Infant parameters          | Placebo ( <i>n</i> = 33 <sup>a</sup> ) | MMS ( <i>n</i> = 32 <sup>b</sup> ) | Difference at V4                         |                             |
|----------------------------|----------------------------------------|------------------------------------|------------------------------------------|-----------------------------|
|                            |                                        |                                    | adj. difference with 95% CI <sup>c</sup> | <i>P</i> value <sup>c</sup> |
| Weight, kg                 |                                        |                                    |                                          |                             |
| V2                         | 4.6±0.57                               | 4.8±0.60                           |                                          |                             |
| V4                         | 6.8±0.75                               | 6.8±0.90                           | -0.16<br>(-0.35, 0.31)                   | 0.069                       |
| WHO z-score weight-for-age |                                        |                                    |                                          |                             |
| V2                         | -0.10±0.85                             | 0.02±0.75                          |                                          |                             |
| V4                         | -0.10±0.87                             | -0.15±1.07                         | -0.17<br>(-0.48, 0.13)                   | 0.136                       |
| Length, cm                 |                                        |                                    |                                          |                             |
| V2                         | 56.1±2.19                              | 57.4±2.49                          |                                          |                             |
| V4                         | 65.2±2.49                              | 64.7±2.33                          | -1.29<br>(-3.31, 0.74)                   | 0.111                       |
| WHO z-score length-for-age |                                        |                                    |                                          |                             |
| V2                         | 0.47±1.08                              | 0.92±1.11                          |                                          |                             |
| V4                         | 1.01±1.13                              | 0.55±0.93                          | -0.69<br>(-1.84, 0.47)                   | 0.125                       |

<sup>a</sup> *n* = 30 for z-score; <sup>b</sup> *n* = 31 for z-score; <sup>c</sup> coefficients (difference in MMS compared to placebo group), 95% confidence interval (CI) and *p*-value of respective outcome at V4 from robust regression with clustering on site with adjustment for respective anthropometric measure at V2, study site and sex; SD, standard deviation; V, visit.

## References

1. Food Nutrition Board of the Institute of Medicine. Nutrient Recommendations: Dietary Reference Intakes (DRI). National Institutes of Health, Office of Dietary Supplements **2020**, [https://ods.od.nih.gov/Health Information/Dietary Reference Intakes.aspx](https://ods.od.nih.gov/Health%20Information/Dietary%20Reference%20Intakes.aspx). Date accessed: 1 Apr 2020.
2. Flock, M.R.; Harris, W.S.; Kris-Etherton, P.M. Long-chain omega-3 fatty acids: time to establish a dietary reference intake. *Nutr Rev* **2013**, *71*, 692-707.
3. Fairbrother, N.; Hutton, E.K.; Stoll, K.; Hall, W.; Kluka, S. Psychometric evaluation of the Multidimensional Assessment of Fatigue scale for use with pregnant and postpartum women. *Psychol Assess* **2008**, *20*, 150-158.
4. Wambach, K.A. Maternal fatigue in breastfeeding primiparae during the first nine weeks postpartum. *J Hum Lact* **1998**, *14*, 219-229.
5. Mulligan, A.A.; Luben, R.N.; Bhaniani, A.; Parry-Smith, D.J.; O'Connor, L.; Khawaja, A.P.; Forouhi, N.G.; Khaw, K.T. A new tool for converting food frequency questionnaire data into nutrient and food group values: FETA research methods and availability. *BMJ Open* **2014**, *4*, e004503.
6. IOM (Institute of Medicine). *Dietary reference intakes for calcium and vitamin D*. The National Academies Press: Washington DC, 2011.
